# Supplementary material
Source: MDPI journal article supplement (https://www.mdpi.com/2039-4349/11/4/52)
Supplement: s1 [file s1]

**Table S1:** Hearing loss genes analyzed by Next Generation Sequencing.

| <b>Gene</b>     | <b>Gene<br/>MIM number</b> | <b>Phenotype</b>                                                                                                                   |
|-----------------|----------------------------|------------------------------------------------------------------------------------------------------------------------------------|
| <i>ACTG1</i>    | 102560                     | Deafness autosomal dominant 20/26                                                                                                  |
| <i>ADGRV1</i>   | 602851                     | Usher syndrome type 2C                                                                                                             |
| <i>CCDC50</i>   | 611051                     | Deafness autosomal dominant 44                                                                                                     |
| <i>CDH23</i>    | 605516                     | Deafness autosomal recessive 12 / Usher syndrome type 1D / Usher syndrome type 1D/F digenic                                        |
| <i>CEACAM16</i> | 614591                     | Deafness autosomal recessive 113 / Deafness autosomal dominant 4B                                                                  |
| <i>CIB2</i>     | 605564                     | Deafness autosomal recessive 48 / Usher syndrome type IJ                                                                           |
| <i>CISD2</i>    | 611507                     | Wolfram syndrome 2                                                                                                                 |
| <i>CLDN14</i>   | 605608                     | Deafness autosomal recessive 29                                                                                                    |
| <i>CLRN1</i>    | 606397                     | Usher syndrome type 3A                                                                                                             |
| <i>COCH</i>     | 603196                     | Deafness autosomal recessive 110 / Deafness autosomal dominant 9                                                                   |
| <i>COL11A1</i>  | 120280                     | Deafness autosomal dominant 37 / Stickler syndrome type II                                                                         |
| <i>COL11A2</i>  | 120290                     | Deafness autosomal recessive 53 / Deafness autosomal dominant 13 / Otospondylomegaepiphyseal dysplasia                             |
| <i>COL2A1</i>   | 120140                     | Stickler syndrome type I                                                                                                           |
| <i>COL4A3</i>   | 120070                     | Alport syndrome autosomal recessive / Alport syndrome autosomal dominant                                                           |
| <i>COL4A4</i>   | 120131                     | Alport syndrome autosomal recessive                                                                                                |
| <i>COL4A5</i>   | 303630                     | Alport syndrome X-linked                                                                                                           |
| <i>COL9A1</i>   | 120210                     | Stickler syndrome type IV                                                                                                          |
| <i>COL9A2</i>   | 120260                     | Stickler syndrome type V                                                                                                           |
| <i>CRYM</i>     | 123740                     | Deafness autosomal dominant 40                                                                                                     |
| <i>DIABLO</i>   | 605219                     | Deafness autosomal dominant 64                                                                                                     |
| <i>DIAPH1</i>   | 602121                     | Deafness autosomal dominant 1                                                                                                      |
| <i>DIAPH3</i>   | 614567                     | Auditory neuropathy autosomal dominant 1                                                                                           |
| <i>ESPN</i>     | 606351                     | Deafness autosomal recessive 36 / Deafness neurosensory without vestibular involvement autosomal dominant / Usher syndrome type 1M |
| <i>EYA4</i>     | 603550                     | Deafness autosomal dominant 10                                                                                                     |
| <i>FOXI1</i>    | 601093                     | Enlarged vestibular aqueduct                                                                                                       |
| <i>GATA3</i>    | 131320                     | Hypoparathyroidism, sensorineural deafness, and renal dysplasia                                                                    |
| <i>GIPC3</i>    | 608792                     | Deafness autosomal recessive 15                                                                                                    |
| <i>GJB2</i>     | 121011                     | Deafness autosomal recessive 1A / Deafness digenic GJB2/GJB6 / Deafness autosomal dominant 3A                                      |
| <i>GJB3</i>     | 603324                     | Deafness digenic GJB2/GJB3 / Deafness autosomal dominant 2B                                                                        |
| <i>GJB6</i>     | 604418                     | Deafness autosomal recessive 1B / Deafness digenic GJB2/GJB6 / Deafness autosomal dominant 3B                                      |
| <i>GRHL2</i>    | 608576                     | Deafness autosomal dominant 28                                                                                                     |
| <i>GRXCR1</i>   | 613283                     | Deafness autosomal recessive 25                                                                                                    |
| <i>GSDME</i>    | 608798                     | Deafness autosomal dominant 5                                                                                                      |
| <i>HARS1</i>    | 142810                     | Usher syndrome type 3B                                                                                                             |
| <i>HGF</i>      | 142409                     | Deafness autosomal recessive 39                                                                                                    |
| <i>KCNJ10</i>   | 602208                     | Enlarged vestibular aqueduct digenic                                                                                               |
| <i>KCNQ4</i>    | 603537                     | Deafness autosomal dominant 2A                                                                                                     |
| <i>LOXHD1</i>   | 613072                     | Deafness autosomal recessive 77                                                                                                    |
| <i>MIR96</i>    | 611606                     | Deafness autosomal dominant 50                                                                                                     |

| Gene           | Gene<br>MIM number | Phenotype                                                                                   |
|----------------|--------------------|---------------------------------------------------------------------------------------------|
| <i>MITF</i>    | 156845             | Waardenburg syndrome type 2A                                                                |
| <i>MSRB3</i>   | 613719             | Deafness autosomal recessive 74                                                             |
| <i>MYH14</i>   | 608568             | Deafness autosomal dominant 4A                                                              |
| <i>MYH9</i>    | 160775             | Deafness autosomal dominant 17                                                              |
| <i>MYO15A</i>  | 602666             | Deafness autosomal recessive 3                                                              |
| <i>MYO6</i>    | 600970             | Deafness autosomal recessive 37 / Deafness autosomal dominant 22                            |
| <i>MYO7A</i>   | 276903             | Deafness autosomal recessive 2 / Deafness autosomal dominant 11 / Usher syndrome type 1B    |
| <i>OSBPL2</i>  | 606731             | Deafness autosomal dominant 67                                                              |
| <i>OTOA</i>    | 607038             | Deafness autosomal recessive 22                                                             |
| <i>OTOF</i>    | 603681             | Deafness autosomal recessive 9 / Auditory neuropathy autosomal recessive 1                  |
| <i>OTOG</i>    | 604487             | Deafness autosomal recessive 18B                                                            |
| <i>OTOGL</i>   | 614925             | Deafness autosomal recessive 84B                                                            |
| <i>P2RX2</i>   | 600844             | Deafness autosomal dominant 41                                                              |
| <i>PAX3</i>    | 606597             | Waardenburg syndrome type 1 and type 3                                                      |
| <i>PCDH15</i>  | 605514             | Deafness autosomal recessive 23 / Usher syndrome type 1F / Usher syndrome type 1D/F digenic |
| <i>PDZD7</i>   | 612971             | Deafness autosomal recessive 57 / Usher syndrome type IIC                                   |
| <i>PJKV</i>    | 610219             | Deafness autosomal recessive 59                                                             |
| <i>POU3F4</i>  | 300039             | Deafness X-linked 2                                                                         |
| <i>POU4F3</i>  | 602460             | Deafness autosomal dominant 15                                                              |
| <i>PRPS1</i>   | 311850             | Deafness X-linked 1                                                                         |
| <i>PTPRQ</i>   | 603317             | Deafness autosomal recessive 84A / Deafness autosomal dominant 73                           |
| <i>RDX</i>     | 179410             | Deafness autosomal recessive 24                                                             |
| <i>SIX1</i>    | 601205             | Deafness autosomal dominant 23                                                              |
| <i>SLC17A8</i> | 607557             | Deafness autosomal dominant 25                                                              |
| <i>SLC26A4</i> | 605646             | Deafness autosomal recessive 4 with enlarged vestibular aqueduct / Pendred syndrome         |
| <i>SMPX</i>    | 300226             | Deafness X-linked 4                                                                         |
| <i>STRC</i>    | 606440             | Deafness autosomal recessive 16                                                             |
| <i>SYNE4</i>   | 615535             | Deafness autosomal recessive 76                                                             |
| <i>TBC1D24</i> | 613577             | Deafness autosomal recessive 86 / Deafness autosomal dominant 65                            |
| <i>TECTA</i>   | 602574             | Deafness autosomal recessive 21 / Deafness autosomal dominant 8/12                          |
| <i>TMC1</i>    | 606706             | Deafness autosomal recessive 7 / Deafness autosomal dominant 36                             |
| <i>TMPRSS3</i> | 605511             | Deafness autosomal recessive 8/10                                                           |
| <i>TNC</i>     | 187380             | Deafness autosomal dominant 56                                                              |
| <i>TPRN</i>    | 613354             | Deafness autosomal recessive 79                                                             |
| <i>TRIOBP</i>  | 609761             | Deafness autosomal recessive 28                                                             |
| <i>USH1C</i>   | 605242             | Deafness autosomal recessive 18A                                                            |
| <i>USH1G</i>   | 607696             | Usher syndrome type 1G                                                                      |
| <i>USH2A</i>   | 608400             | Usher syndrome type 2A                                                                      |
| <i>WFS1</i>    | 606201             | Deafness autosomal dominant 6/14/38 / Wolfram syndrome 1                                    |
| <i>WHRN</i>    | 607928             | Deafness autosomal recessive 31 / Usher syndrome type 2D                                    |

**Table S2.** Pathogenic and likely pathogenic *ACTG1* variants reported in patients with Baraitser-Winter syndrome and/or associated congenital anomalies.

| Exon <sup>1</sup> | Nucleotide change <sup>1</sup> | Protein change <sup>1</sup> | Protein subdomain <sup>2</sup> | Phenotype                                                                                        | Reference                                                                          |
|-------------------|--------------------------------|-----------------------------|--------------------------------|--------------------------------------------------------------------------------------------------|------------------------------------------------------------------------------------|
| 2                 | c.34A>G                        | p.Asn12Asp                  | 1                              | Baraitser-Winter syndrome                                                                        | Di Donato et al. (2016) [47]                                                       |
| 2                 | c.118C>T                       | p.His40Tyr                  | 2                              | Baraitser-Winter syndrome                                                                        | Posey et al. (2017) [54]; ClinVar database (Variation ID: 374385)                  |
| 3                 | c.173C>T                       | p.Ala58Val                  | 2                              | Baraitser-Winter syndrome; DFNA20/26 (?)                                                         | Kemerley et al. (2017) [52]                                                        |
| 3                 | c.176A>G                       | p.Gln59Arg                  | 2                              | Baraitser-Winter syndrome                                                                        | Chacon-Camacho et al. (2020) [63]                                                  |
| 3                 | c.209C>T                       | p.Pro70Leu                  | 1                              | Ocular coloboma                                                                                  | Rainger et al. (2017) [55]                                                         |
| 3                 | c.221G>T                       | p.Gly74Val                  | 1                              | Baraitser-Winter syndrome                                                                        | Gieldon et al. (2018) [64]                                                         |
| 3                 | c.359C>T                       | p.Thr120Ile                 | 1                              | Baraitser-Winter syndrome                                                                        | Rivière et al. (2012) [6]; Verloes et al. (2015) [7]; Di Donato et al. (2014) [48] |
| 4                 | c.404C>T                       | p.Ala135Val                 | 1                              | Baraitser-Winter syndrome                                                                        | Rivière et al. (2012) [6]; Verloes et al. (2015) [7]                               |
| 4                 | c.439C>T                       | p.Arg147Cys                 | 3                              | Baraitser-Winter syndrome                                                                        | ClinVar database (Variation ID: 1012294)                                           |
| 4                 | c.459G>A                       | p.Met153Ile                 | 3                              | Microlissencephaly; Baraitser-Winter syndrome (?)                                                | Poirier et al. (2015) [49]                                                         |
| 4                 | c.464C>T                       | p.Ser155Phe                 | 3                              | Baraitser-Winter syndrome                                                                        | Rivière et al. (2012) [6]; Verloes et al. (2015) [7]; Allawh et al. (2017) [51]    |
| 4                 | c.499G>A                       | p.Gly167Lys                 | 3                              | Congenital diaphragmatic hernia, multiple minor anomalies, autism; Baraitser-Winter syndrome (?) | Longoni et al. (2017) [53]                                                         |
| 4                 | c.574A>T                       | p.Ile192Phe                 | 4                              | Multiple congenital anomalies; Baraitser-Winter syndrome (?)                                     | Retterer et al. (2016) [50]                                                        |
| 4                 | c.608C>A                       | p.Thr203Lys                 | 4                              | Baraitser-Winter syndrome                                                                        | Rivière et al. (2012) [6]; Verloes et al. (2015) [7]                               |
| 4                 | c.608C>T                       | p.Thr203Met                 | 4                              | Baraitser-Winter syndrome                                                                        | Vontell et al. (2019) [60]; Chacon-Camacho et al. (2020) [63]                      |
| 4                 | c.611C>G                       | p.Ala204Gly                 | 4                              | Baraitser-Winter syndrome                                                                        | ClinVar database (Variation ID: 452404)                                            |

| Exon <sup>1</sup> | Nucleotide change <sup>1</sup> | Protein change <sup>1</sup> | Protein subdomain <sup>2</sup> | Phenotype                                     | Reference                                                                                                        |
|-------------------|--------------------------------|-----------------------------|--------------------------------|-----------------------------------------------|------------------------------------------------------------------------------------------------------------------|
| 4                 | c.616C>T                       | p.Arg206Trp                 | 4                              | Polymicrogyria; Baraitser-Winter syndrome (?) | Stutterd et al. (2021) [65]                                                                                      |
| 4                 | c.628C>G                       | p.Arg210Gly                 | 4                              | Baraitser-Winter syndrome                     | Yamamoto et al. (2019) [61]                                                                                      |
| 4                 | c.628C>T                       | p.Arg210Cys                 | 4                              | Baraitser-Winter syndrome                     | Thiffault et al. (2019) [59]                                                                                     |
| 4                 | c.640G>A                       | p.Glu214Lys                 | 4                              | Baraitser-Winter syndrome                     | Homma et al. (2019) [58]                                                                                         |
| 4                 | c.728C>T                       | p.Pro243Leu                 | 4                              | Baraitser-Winter syndrome; microlissencephaly | Poirier et al. (2015) [49]; ClinVar database (Variation ID: 807363)                                              |
| 4                 | c.760C>T                       | p.Arg254Trp                 | 4                              | Baraitser-Winter syndrome                     | Rivière et al. (2012) [6]; Verloes et al. (2015) [7]; Di Donato et al. (2016) [47]; Di Donato et al. (2018) [57] |
| 4                 | c.766C>T                       | p.Arg256Trp                 | 4                              | Baraitser-Winter syndrome                     | Rivière et al. (2012) [6]; Verloes et al. (2015) [7]; Di Donato et al. (2016) [47]; Di Donato et al. (2018) [57] |
| 4                 | c.767G>A                       | p.Arg256Gln                 | 4                              | Baraitser-Winter syndrome                     | Accogli et al. (2020) [62]                                                                                       |
| 4                 | c.773C>T                       | p.Pro258Leu                 | 4                              | Baraitser-Winter syndrome                     | Zazo Seco et al. (2017) [56]; Perea-Romero et al. (2021) [66]                                                    |
| 6                 | c.1000G>C                      | p.Glu334Gln                 | 3                              | Baraitser-Winter syndrome                     | Di Donato et al. (2016) [47]                                                                                     |
| 6                 | c.1004G>A                      | p.Arg335His                 | 3                              | Baraitser-Winter syndrome                     | Di Donato et al. (2016) [47]                                                                                     |

<sup>1</sup> Exon numbering and nucleotide changes of *ACTG1* gene was reported according to the RefSeq transcript NM\_001614; the predicted protein change based on DNA data was reported according to the RefSeq protein NP\_001605.1.

<sup>2</sup> Subdomain 1 (residues 1-32, 70-144, and 338-372), subdomain 2 (residues 33-69), subdomain 3 (residues 145-180, and 270-337), subdomain 4 (residues 181-269). [34, 35]

**Table S3.** *ACTG1* variants of uncertain significance reported in patients with Baraitser-Winter syndrome and/or associated congenital anomalies (only variants with MAF=0 in gnomAD v2.1.1 are reported).

| Exon <sup>1</sup> | Nucleotide change <sup>1</sup> | Protein change <sup>1</sup> | Protein subdomain <sup>2</sup> | Phenotype                                                                      | Reference                                                  |
|-------------------|--------------------------------|-----------------------------|--------------------------------|--------------------------------------------------------------------------------|------------------------------------------------------------|
| 2                 | c.88G>T                        | p.Val30Leu                  | 1                              | Pachygyria and corpus callosum partial agenesis; Baraitser-Winter syndrome (?) | Accogli et al. (2020) [62]                                 |
| 3                 | c.223A>C                       | p.Ile75Leu                  | 1                              | Microlissencephaly; Baraitser-Winter syndrome (?)                              | Poirier et al. (2015) [49]                                 |
| 4                 | c.430G>A                       | p.Ala144Pro                 | 1                              | Baraitser-Winter syndrome                                                      | ClinVar database (Variation ID: 434079)                    |
| 4                 | c.485C>T                       | p.Thr162Met                 | 3                              | Baraitser-Winter syndrome                                                      | ClinVar database (Variation ID: 1029360)                   |
| 4                 | c.535G>T                       | p.Asp179Tyr                 | 3                              | Baraitser-Winter syndrome                                                      | Di Donato et al. (2016) [47]; Di Donato et al. (2018) [57] |
| 4                 | c.598T>A                       | p.Phe200Ile                 | 4                              | Baraitser-Winter syndrome                                                      | ClinVar database (Variation ID: 128266)                    |

<sup>1</sup> Exon numbering and nucleotide changes of *ACTG1* gene was reported according to the RefSeq transcript NM\_001614; the predicted protein change based on DNA data was reported according to the RefSeq protein NP\_001605.1.

<sup>2</sup> Subdomain 1 (residues 1-32, 70-144, and 338-372), subdomain 2 (residues 33-69), subdomain 3 (residues 145-180, and 270-337), subdomain 4 (residues 181-269). [34, 35]

MAF: minor allele frequency

gnomAD (genome aggregation database): <https://gnomad.broadinstitute.org>

ClinVar: <https://www.ncbi.nlm.nih.gov/clinvar/>
